# Supplementary material for: Automated Adherence Reminders for High Risk Children With Asthma: A Research Protocol
Source: PubMed Central journal article supplement (PMC5387114; doi:10.2196/resprot.6674), 2017-03-27
Supplement: resprot_v6i3e48_app2.pdf [file resprot_v6i3e48_app2.pdf]

**Parental-Child Conflict Assessment**

|                                                                                                                                                   |       |             |                  |              |            |
|---------------------------------------------------------------------------------------------------------------------------------------------------|-------|-------------|------------------|--------------|------------|
| <b>How much</b> does your child resist (e.g., complain, fuss, run away, argue, refuse to do it) when it is time to take his/her daily medication? | A Lot | Quite a Bit | Some of the Time | A Little Bit | Not At All |
|---------------------------------------------------------------------------------------------------------------------------------------------------|-------|-------------|------------------|--------------|------------|

|                                                                                                                                                    |                 |                  |                  |                          |       |
|----------------------------------------------------------------------------------------------------------------------------------------------------|-----------------|------------------|------------------|--------------------------|-------|
| <b>How often</b> does your child resist (e.g., complain, fuss, run away, argue, refuse to do it) when it is time to take his/her daily medication? | All of the Time | Most of the Time | Some of the Time | A Little Bit of the Time | Never |
|----------------------------------------------------------------------------------------------------------------------------------------------------|-----------------|------------------|------------------|--------------------------|-------|
